# Supplementary material
Source: publisher site journal article supplement (https://www.dovepress.com/article/605078)
Supplement: Supplementary file 1 [file 605078%20Supplementary%20Materials.docx]

### **Understanding Gaps in Pharmacist–Patient Role Perceptions: Implications for Collaborative Care**

We are conducting a survey titled:

*Understanding Gaps in Pharmacist–Patient Role Perceptions: Implications for Collaborative Care.*

This study aims to explore differences in how pharmacists and patients perceive their respective roles, and how these gaps may affect communication, collaboration, and the quality of healthcare delivery. The findings are expected to provide valuable insights to support improvements in collaborative care practices. The study has been developed by experts in pharmacy and health sciences for research purposes. We are committed to protecting your privacy. All responses will remain anonymous and confidential, and the data will be used solely for research purposes. Participation is voluntary, and you may withdraw at any time. The questionnaire will take approximately 10 minutes to complete. Your participation is highly appreciated

Thank you for your time and support.

**I have read the instructions, and I agree to participate in this study.**

- **I agree**

**Sociodemographic: Pharmacists**

Age: __________(years)

Gender:

○ Female

○ Male

Nationality:

○ Jordanian

○ Others

Educational background:

○ Diploma

○ Bachelor's degree in pharmacy

○ Doctor of Pharmacy (PharmD)

○ Master or PhD

Pharmacy type:

○ Chain Community Pharmacy

○ Outpatient Hospital Pharmacy

○ Independent Community Pharmacy

Location of pharmacy:

○ Amman

○ Other

Primary position in the community pharmacy:

○ Employee Pharmacist

○ Owner Pharmacist

○ Owner Pharmacist and Pharmacist-in-Charge

○ Pharmacist Assistant

○ Pharmacist-in-Charge

Experience level:

○ Entry-Level

○ Junior

○ Mid-Level

○ Senior

○ Advanced

○ Expert

Number of patients served per day:

○ 20 patients or less

○ 21–40 patients

○ More than 40 patients

Number of prescriptions dispensed per day:

○ 10 prescriptions or less

○ 11–20 prescriptions

○ More than 20 prescriptions

Do you have a space area for patient counseling in the pharmacy?

○ No ○ Yes

How would you rate the workload of a community pharmacy?

○ Low ○ Average ○ High

Do you have internet access in the pharmacy?

○ No ○ Yes

Workshop types attended (select all that apply):

○ Communication skills

○ Pharmacy practice/Pharmaceutical care

○ Patient interviewing skills

○ Health services provision

Primary sources of drug information (select all that apply):

○ Internet

○ Lexicomp

○ Research articles

○ Drug Index

○ Ministry of Health Website

○ British National Formulary

○ Martindale

**Sociodemographic: Patient**

Age: __________(years)

Gender:

○ Female

○ Male

Nationality:

○ Jordanian

○ Other

Marital status:

○ Married

○ Other

What is your highest level of education?

○ Diploma degree or less

○ Bachelor's degree

○ Graduate studies (Master's / PhD)

What is your current job position?

○ Business owner

○ Student

○ Unemployed

○ Retired

○ Employee

Do you work in the medical field?

○ Yes ○ No

What is your monthly income level (in Jordanian Dinars):

○ Less than 500 JOD

○ 500–1000 JOD

○ More than 1000 JOD

Do you currently have health insurance?

○ Yes ○ No

Community pharmacy visits per month:

○ Less than 5 times

○ 5–10 times

○ More than 10 times

Primary source of pharmaceutical care:

○ Community pharmacy

○ Chain pharmacy

○ Outpatient hospital pharmacy

Reasons for visiting community pharmacies (select all that apply):

○ To obtain over-the-counter medications

○ To obtain prescribed medications

○ To purchase other pharmaceutical supplies (cosmetics, sunscreen, baby care products)

○ Free pharmaceutical consultation

○ To obtain herbal medicines

○ To obtain general health information from the pharmacist

○ To acquire home monitoring devices (blood pressure monitor, blood sugar monitor)

○ To get information on first aid

Existing health conditions (select all that apply):

○ Headache

○ Depression

○ Digestive disorders

○ Cancer

Do you have a good relationship with the pharmacist at the community pharmacy for managing your medications?

○ Yes ○ No

Length of relationship with community pharmacist:

○ Less than one year ○ 1–5 years ○ 5–10 years ○ More than 10 years

Satisfaction with community pharmacy services:

○ Completely dissatisfied ○ Dissatisfied ○ Neutral ○ Satisfied ○ Very satisfied

Do you have a family member working in the pharmaceutical sector?

○ Yes ○ No

Family history of chronic disease:

○ Yes ○ No

**Perception on the pharmacist’s role**

Please rate your level of agreement with each statement about what pharmacists should do in the pharmacist–patient relationship.

*Scale: 1 = Strongly Disagree, 2 = Disagree, 3 = Neutral, 4 = Agree, 5 = Strongly Agree*

*Information Sharing*

1. Talk with patients about how to watch for medication side effects

2. Talk with patients even if the patients don't have any medication questions

3. Talk with patients about whether it is OK to take their medications with over-the-counter products

*Responsible behavior*

4. Show an interest in working with patients to meet their health care needs

5. Communicate a desire to help patients manage their medications

6. Ensure patients understand how to use their medications before leaving the pharmacy

7. Communicate a desire to help patients with their medication concerns

*Patient-centeredness*

8. Listen to patients when they have a medication question

9. Be easily approachable to discuss medication concerns

*Interpersonal Communication*

10. Greet patients at the prescription counter and collect prescription information

11. Say 'hello' to patients when they visit the pharmacy

**Perception of the patient role**

Please rate your level of agreement with each statement about what patients should do in the pharmacist–patient relationship.

*Scale: 1 = Strongly Disagree, 2 = Disagree, 3 = Neutral, 4 = Agree, 5 = Strongly Agree*

*Information Sharing*

1. Discuss medication problems with the pharmacist

2. Inform the pharmacist of changes in their health condition(s)

3. Disclose herbal medications taken with prescriptions

4. Disclose over-the-counter medications taken with prescriptions

5. Report any medication side effects

6. Report drug allergies

7. Inform the pharmacist if obtaining prescriptions from another pharmacy

*Responsible behavior*

8. Collaborate with the pharmacist to manage medications

**فهم الفجوات في تصورات أدوار الصيدلي والمريض وانعكاساتها على الرعاية التعاونية**

نحن بصدد إجراء استبيان بعنوان:

*فهم الفجوات في تصورات أدوار الصيدلي والمريض وانعكاساتها على الرعاية التعاونية*

تهدف هذه الدراسة إلى استكشاف الاختلافات في كيفية إدراك الصيادلة والمرضى لأدوارهم، وكيف يمكن أن تؤثر هذه الفجوات في التواصل والتعاون وجودة تقديم الرعاية الصحية. ومن المتوقع أن توفر النتائج رؤى قيّمة تدعم تحسين ممارسات الرعاية التعاونية.

أُعدت هذه الدراسة من قبل مختصين في الصيدلة والعلوم الصحية لأغراض بحثية.

نحن ملتزمون بحماية خصوصيتك. ستظل جميع الإجابات مجهولة الهوية وسرية، ولن تُستخدم البيانات إلا لأغراض البحث العلمي فقط. المشاركة طوعية، ويمكنك الانسحاب في أي وقت.

سيستغرق استكمال هذا الاستبيان نحو 10 دقائق.

نقدّر مشاركتك كثيرًا.

شكرًا لك على وقتك ودعمك.

**لقد قرأت التعليمات، وأوافق على المشاركة في هذه الدراسة.**

○ أوافق

**البيانات الاجتماعية والديموغرافية: الصيادلة**

**العمر: ____________ (سنة)**

**الجنس:**

○ أنثى

○ ذكر

**الجنسية:**

○ أردني/ة

○ أخرى

**المؤهل العلمي:**

○ دبلوم

○ بكالوريوس في الصيدلة

○ دكتور صيدلة (PharmD)

○ ماجستير أو دكتوراه

**نوع الصيدلية:**

○ صيدلية مجتمعية تابعة لسلسلة

○ صيدلية مستشفى للعيادات الخارجية

○ صيدلية مجتمعية مستقلة

**موقع الصيدلية:**

○ عمّان

○ أخرى

**المنصب الأساسي في الصيدلية المجتمعية:**

○ صيدلي موظف

○ صيدلي مالك

○ صيدلي مالك وصيدلي مسؤول

○ مساعد صيدلي

○ صيدلي مسؤول

**مستوى الخبرة:**

○ حديث التخرج

○ مبتدئ

○ متوسط

○ أقدم

○ متقدم

○ خبير

**عدد المرضى الذين يتم خدمتهم يوميًا:**

○ 20 مريضًا أو أقل

○ 21-40 مريضًا

○ أكثر من 40 مريضًا

**عدد الوصفات الطبية التي يتم صرفها يوميًا:**

○ 10 وصفات طبية أو أقل

○ 11-20 وصفة طبية

○ أكثر من 20 وصفة طبية

**هل توجد في الصيدلية مساحة مخصصة لتقديم الاستشارات للمرضى؟**

○ لا

○ نعم

**كيف تقيّم عبء العمل في الصيدلية المجتمعية؟**

○ منخفض

○ متوسط

○ مرتفع

**هل يتوفر اتصال بالإنترنت في الصيدلية؟**

○ لا

○ نعم

**أنواع ورش العمل التي حضرتها (يمكن اختيار أكثر من إجابة):**

○ مهارات التواصل

○ الممارسة الصيدلانية / الرعاية الصيدلانية

○ مهارات مقابلة المريض

○ تقديم الخدمات الصحية

**المصادر الأساسية لمعلومات الأدوية (يمكن اختيار أكثر من إجابة):**

○ الإنترنت

○ Lexicomp

○ المقالات البحثية

○ دليل الأدوية

○ موقع وزارة الصحة

○ الدليل البريطاني الوطني للأدوية (BNF)

○ Martindale

**البيانات الاجتماعية والديموغرافية: المرضى**

**العمر: ____________ (سنة)**

**الجنس:**

○ أنثى

○ ذكر

**الجنسية:**

○ أردني/ة

○ أخرى

**الحالة الاجتماعية:**

○ متزوج/ة

○ أخرى

**ما أعلى مستوى تعليمي حصلت عليه؟**

○ دبلوم أو أقل

○ بكالوريوس

○ دراسات عليا (ماجستير / دكتوراه)

**ما هو وضعك الوظيفي الحالي؟**

○ صاحب عمل

○ طالب

○ عاطل عن العمل

○ متقاعد

○ موظف

**هل تعمل في المجال الطبي؟**

○ نعم

○ لا

**ما مستوى دخلك الشهري (بالدينار الأردني)؟**

○ أقل من 500 دينار أردني

○ 500-1000 دينار أردني

○ أكثر من 1000 دينار أردني

**هل لديك تأمين صحي حاليًا؟**

○ نعم

○ لا

**عدد زياراتك للصيدلية المجتمعية شهريًا:**

○ أقل من 5 مرات

○ 5-10 مرات

○ أكثر من 10 مرات

**المصدر الرئيسي للرعاية الدوائية:**

○ الصيدلية المجتمعية

○ صيدلية تابعة لسلسلة

○ صيدلية العيادات الخارجية بالمستشفى

**أسباب زيارة الصيدليات المجتمعية (يمكن اختيار أكثر من إجابة):**

○ للحصول على أدوية تُصرف دون وصفة طبية

○ للحصول على أدوية موصوفة

○ لشراء مستلزمات صيدلانية أخرى (مثل مستحضرات التجميل، وواقي الشمس، ومنتجات رعاية الطفل)

○ للحصول على استشارة دوائية مجانية

○ للحصول على أدوية عشبية

○ للحصول على معلومات صحية عامة من الصيدلي

○ لشراء أجهزة المراقبة المنزلية (مثل جهاز ضغط الدم أو جهاز قياس سكر الدم)

○ للحصول على معلومات عن الإسعافات الأولية

**هل لديك علاقة جيدة مع الصيدلي في الصيدلية المجتمعية فيما يتعلق بإدارة أدويتك؟**

○ نعم

○ لا

**مدة علاقتك بصيدلي الصيدلية المجتمعية:**

○ أقل من سنة واحدة

○ 1-5 سنوات

○ 5-10 سنوات

○ أكثر من 10 سنوات

**مدى رضاك عن خدمات الصيدلية المجتمعية:**

○ غير راضٍ تمامًا

○ غير راضٍ

○ محايد

○ راضٍ

○ راضٍ جدًا

**هل لديك أحد أفراد الأسرة يعمل في القطاع الصيدلاني؟**

○ نعم

○ لا

**هل يوجد تاريخ عائلي للإصابة بأمراض مزمنة؟**

○ نعم

○ لا

**التصورات حول دور الصيدلي**

يرجى تحديد درجة موافقتك على كل عبارة من العبارات التالية حول ما ينبغي أن يقوم به الصيدلي في العلاقة بين الصيدلي والمريض.

*المقياس: 1 = لا أوافق بشدة، 2 = لا أوافق، 3 = محايد، 4 = أوافق، 5 = أوافق بشدة.*

**تبادل المعلومات**

1. التحدث مع المرضى حول كيفية مراقبة الآثار الجانبية للأدوية.

2. التحدث مع المرضى حتى لو لم تكن لديهم أي أسئلة حول الأدوية.

3. التحدث مع المرضى بشأن ما إذا كان من المناسب تناول أدويتهم مع المستحضرات التي تُصرف دون وصفة طبية.

**السلوك المسؤول**

4. إظهار الاهتمام بالعمل مع المرضى لتلبية احتياجاتهم الصحية.

5. إظهار الرغبة في مساعدة المرضى على إدارة أدويتهم.

6. التأكد من أن المرضى يفهمون كيفية استخدام أدويتهم قبل مغادرة الصيدلية.

7. إظهار الرغبة في مساعدة المرضى فيما يتعلق بمخاوفهم الدوائية.

**التركيز على المريض**

8. الإصغاء إلى المرضى عندما تكون لديهم أسئلة حول الأدوية.

9. أن يكون من السهل التواصل مع الصيدلي لمناقشة المخاوف المتعلقة بالأدوية.

**التواصل الشخصي**

10. الترحيب بالمرضى عند منضدة الوصفات الطبية وجمع معلومات الوصفة.

11. قول "مرحبًا" للمرضى عند زيارتهم الصيدلية.

**التصورات حول دور المريض**

يرجى تحديد درجة موافقتك على كل عبارة من العبارات التالية حول ما ينبغي أن يقوم به المريض في العلاقة بين الصيدلي والمريض.

*المقياس: 1 = لا أوافق بشدة، 2 = لا أوافق، 3 = محايد، 4 = أوافق، 5 = أوافق بشدة.*

**تبادل المعلومات**

1. مناقشة المشكلات المتعلقة بالأدوية مع الصيدلي.

2. إبلاغ الصيدلي بأي تغيّرات تطرأ على الحالة الصحية.

3. الإفصاح عن الأدوية العشبية التي يتم تناولها مع الأدوية الموصوفة.

4. الإفصاح عن الأدوية التي تُصرف دون وصفة طبية والتي يتم تناولها مع الأدوية الموصوفة.

5. الإبلاغ عن أي آثار جانبية للأدوية.

6. الإبلاغ عن الحساسية تجاه الأدوية.

7. إبلاغ الصيدلي عند الحصول على وصفات طبية من صيدلية أخرى.

**السلوك المسؤول**

8. التعاون مع الصيدلي في إدارة الأدوية.
